# Supplementary material
Source: MDPI journal article supplement (https://www.mdpi.com/2311-7524/7/1/5)
Supplement: s1 [file s1]

1    **Supplementary Materials**

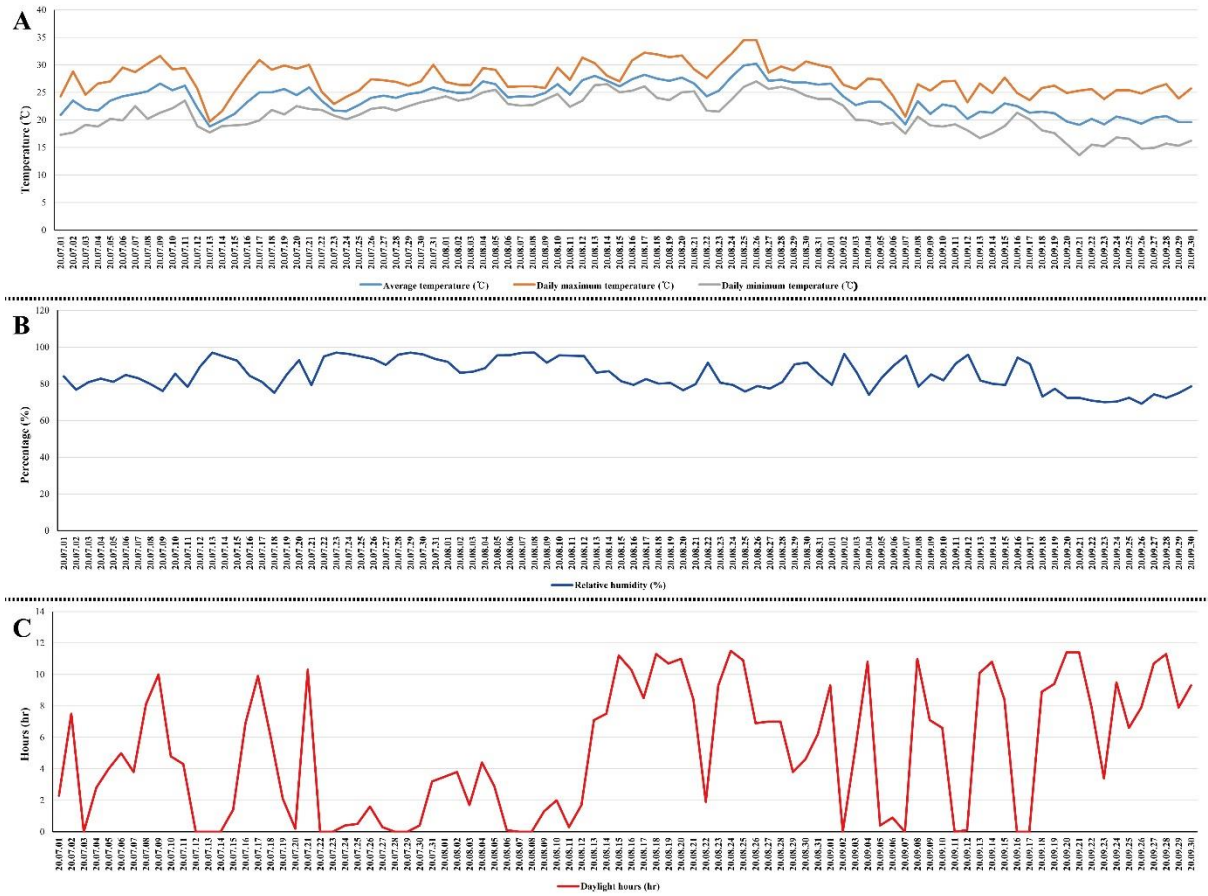

2  
3    **Figure S1.** Temperature conditions (A), relative humidity (B), and daylight hours (C) in Daejeon, South Korea.

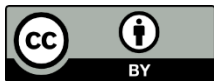

© 2020 by the authors. Submitted for possible open access publication under the terms and conditions of the Creative Commons Attribution (CC BY) license (<http://creativecommons.org/licenses/by/4.0/>).
