# Supplementary material
Source: MDPI journal article supplement (https://www.mdpi.com/2311-7524/7/1/5)
Supplement: s1 [file s1]

Archive with 3 entries (3 files):
- horticulturae-1029165 - Supplementary Materials.docx
- horticulturae-1029165 - Supplementary Materials.pdf
- Table S1. horticulturae-1029165.xlsx
