# Supplementary material
Source: MDPI journal article supplement (https://www.mdpi.com/2311-7524/7/1/5)
Supplement: s1 [file s1 › horticulturae-1029165 - Supplementary Materials.docx]

**Supplementary Materials**


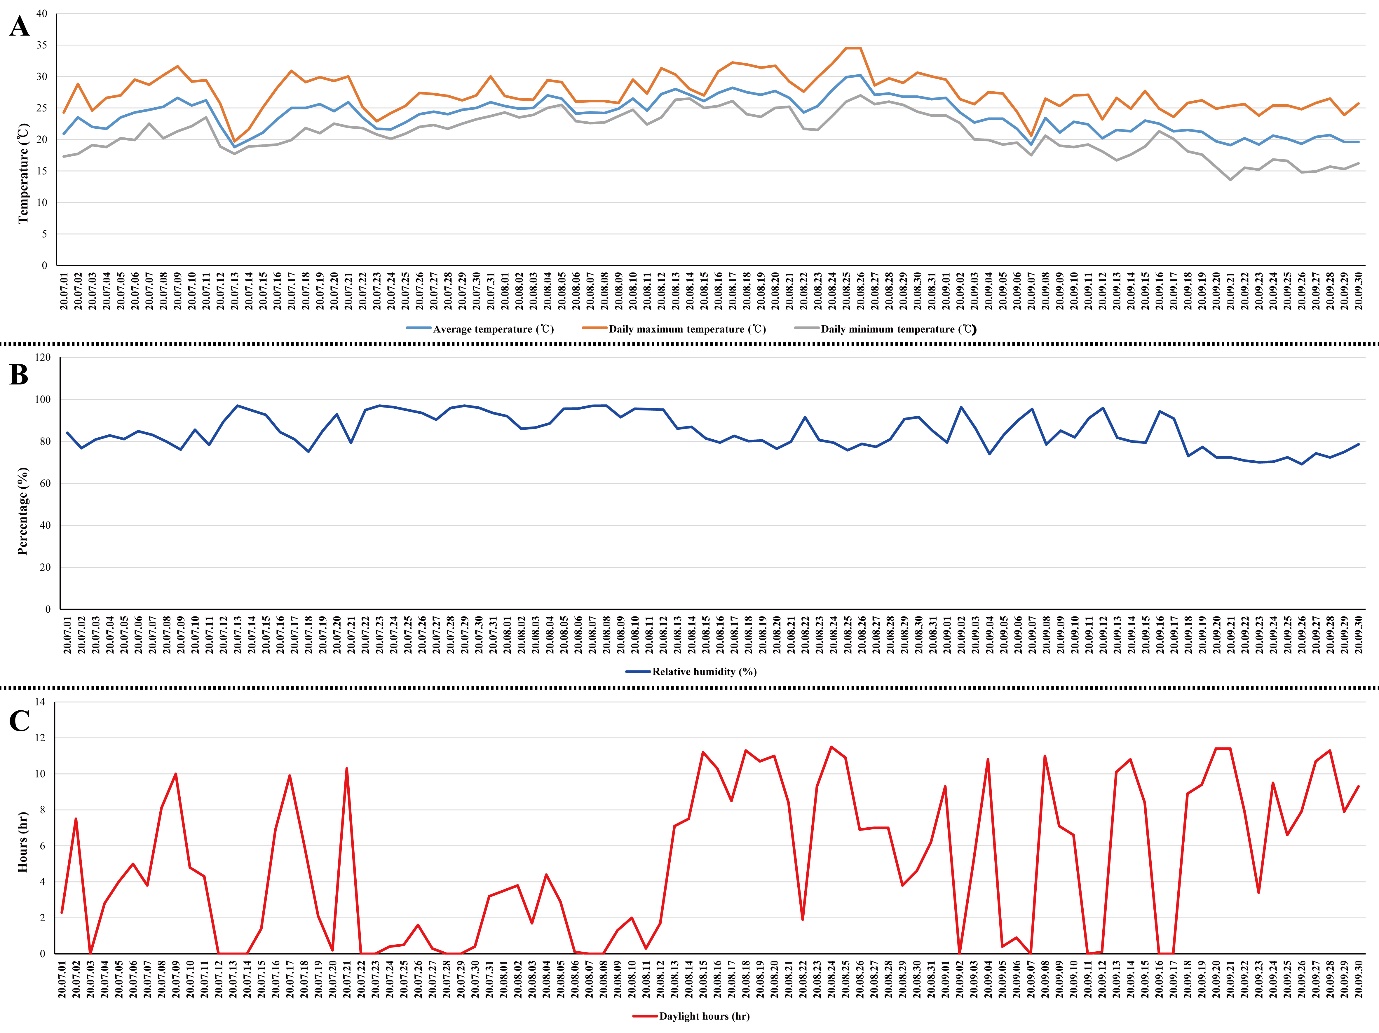


**Figure S1.** Temperature conditions (**A**), relative humidity (**B**), and daylight hours (**C**) in Daejeon, South Korea.

| 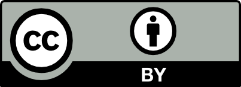 | © 2020 by the authors. Submitted for possible open access publication under the terms and conditions of the Creative Commons Attribution (CC BY) license (http://creativecommons.org/licenses/by/4.0/). |
| --- | --- |
