# Supplementary material
Source: MDPI journal article supplement (https://www.mdpi.com/2311-7524/7/1/5)
Supplement: s1 [file s1 › Table S1. horticulturae-1029165.xlsx]

## Sheet: Sheet1
Table S1. Metabolites identified in the six different Lycoris species using HPLC (mg/g) and GC-TOFMS (ratio/g) analysis
Name	Biological replicates	Pyruvic acid	Lactic acid	Alanine	Oxalic acid	Glycolic acid	Valine	Ethanolamine	Phosphoric acid	Glycerol	Leucine	Isoleucine	Proline	Glycine	Succinica acid	Glyceric acid	Fumaric acid	Serine	Threonine	beta-Alanine	Malic acid	Aspartic acid	Methionine	Pyroglutamic acid	4-Aminobutyric acid	Threonic acid	Cysteine	Glutamic acid	Phenylalanine	Arabinose	Asparagine	Xylitol	Putrescine	Glutamine	Shikimic acid	Citric acid	Quinic acid	Fructose	Mannose	Galactose	Glucose	Mannitol	Lysine	Tyrosine	Inositol	Ferulic acid	Tryptophan	Fructose-6-phosphate	Glucose-6-phosphate
L. radiata-1	replicate 1	0.063	15.998	23.056	17.569	15.63	26.108	30.75	25.376	56.962	24.185	21.787	12.765	6.969	24.28	5.571	3.434	5.794	3.854	1.191	28.228	6.839	2.407	15.892	30.188	1.378	0.05	7.223	3.053	1.064	26.769	0.265	1.287	6.072	0.625	19.021	2.354	861.927	4.32	1.861	83.824	0.536	9.553	8.233	38.077	0.004	0.447	0.02	0.039
L. radiata-2	replicate 2	0.044	10.065	26.242	16.13	12.514	29.483	27.855	40.635	52.999	31.356	27.312	17.242	7.161	16.624	3.684	2.688	5.787	5.47	1.249	39.512	10.129	3.823	21.748	40.829	1.835	0.087	10.998	4.894	0.875	33.478	0.19	1.328	7.655	0.864	32.381	3.527	745.094	5.161	2.066	85.255	0.694	12.252	13.744	38.505	0.005	0.959	0.028	0.062
L. radiata-3	replicate 3	0.048	10.442	25.532	24.024	14.961	28.09	27.639	47.167	53.878	27.759	24.514	15.045	6.828	14.403	3.116	2.576	5.372	5.275	1.533	40.211	10.338	3.684	25.372	37.516	1.939	0.098	10.745	4.902	0.847	31.805	0.158	1.384	7.166	0.866	31.934	3.487	806.841	4.47	1.774	75.719	0.638	11.902	14.395	33.995	0.006	1.163	0.034	0.074
L. chinensis-1	replicate 1	0.052	11.66	37.235	21.827	13.612	45.187	36.689	44.739	55.828	52.388	46.948	17.655	4.033	20.964	3.952	3.576	6.567	4.059	1.747	105.469	11.959	8.227	31.154	33.047	1.984	0.132	13.126	7.881	0.785	27.593	0.203	2.864	13.301	0.974	25.855	0.923	808.461	1.477	2.079	107.431	1.562	18.584	16.178	41.413	0.008	1.898	0.031	0.071
L. chinensis-2	replicate 2	0.049	6.345	29.024	15.43	15.301	38.648	35.86	59.06	56.128	45.845	42.085	15.251	3.893	16.518	2.75	2.866	7.778	4.513	1.56	127.898	14.97	10.493	40.898	42.688	2.185	0.155	18.657	10.518	0.819	37.795	0.15	3.325	18.926	1.004	39.856	0.968	685.894	1.724	2.453	106.264	2.36	27.607	24.395	44.908	0.012	3.245	0.043	0.111
L. chinensis-3	replicate 3	0.054	5.503	34.744	17.344	13.569	44.288	39.083	66.181	59.293	56.167	49.944	19.572	4.161	15.214	2.333	2.721	7.09	5.358	1.633	139.939	18.431	12.582	45.282	45.156	2.321	0.194	22.045	12.358	0.852	41.364	0.148	3.479	21.565	1.026	45.897	1.002	714.51	1.777	2.494	110.802	2.659	31.005	29.236	45.988	0.016	5.172	0.056	0.144
L. uydoensis-1	replicate 1	0.045	7.031	63.315	16.406	10.763	131.799	40.17	111.927	77.216	193.104	152.711	62.973	5.173	16.939	3.281	3.506	11.141	15.95	1.459	140.512	30.754	27.327	61.436	126.303	2.208	0.256	21.684	35.293	1.18	60.805	0.507	3.895	30.441	1.718	27.486	2.437	882.431	2.767	4.413	208.101	6.281	79.427	65.027	64.998	0.015	11.138	0.085	0.229
L. uydoensis-2	replicate 2	0.049	5.208	67.57	16.518	13.055	141.405	43.981	142.517	81.991	207.156	165.786	71.869	5.45	12.948	2.413	2.689	11.249	18.68	1.452	158.253	37.244	32.592	73.391	142.436	2.409	0.285	27.407	42.622	1.309	71.32	0.429	4.538	37.256	1.577	36.061	2.578	891.323	3.175	4.742	208.155	7.844	96.612	84.776	68.224	0.019	16.526	0.114	0.314
L. uydoensis-3	replicate 3	0.052	4.761	50.661	16.71	12.565	110.71	41.859	148.271	78.505	170.721	137.075	60.2	5.257	10.989	2.034	2.357	11.214	17.891	1.503	155.315	36.848	31.16	70.42	136.949	2.404	0.285	27.05	41.154	1.239	72.227	0.174	4.501	38.196	1.514	36.527	2.487	890.074	2.959	4.534	214.035	7.864	95.414	84.875	64.927	0.022	18.617	0.125	0.348
L. sanguinea-1	replicate 1	0.035	5.567	28.382	17.843	11.176	84.248	41.137	131.452	68.78	83.106	89.872	24.221	5.288	13.821	2.514	2.534	11.805	5.069	1.611	44.117	21.374	22.584	55.546	91.774	1.685	0.242	21.398	18.452	0.588	79.528	0.242	3.983	31.442	0.872	72.333	1.066	416.728	0.678	1.869	28.498	4.958	63.557	63.976	83.484	0.021	18.697	0.082	0.215
L. sanguinea-2	replicate 2	0.038	5.927	28.843	22.255	11.169	89.038	41.019	147.207	69.613	82.313	87.398	23.521	5.206	11.379	2.011	2.088	11.485	4.875	1.888	43.093	21.316	21.401	57.288	83.911	1.738	0.25	20.438	18.006	0.567	72.101	0.189	3.575	28.336	0.909	71.273	1.008	410.682	0.774	1.631	25.515	4.55	59.992	61.623	80.524	0.029	21.344	0.084	0.218
L. sanguinea-3	replicate 3	0.04	4.605	38.644	21.838	11.988	111.12	44.969	162.712	76.506	110.995	112.569	30.213	5.828	10.855	1.852	1.8	12.426	5.633	1.947	49.292	24.846	25.145	60.098	95.276	1.927	0.303	25.083	20.992	0.641	89.142	0.219	4.201	36.604	0.902	85.406	1.146	464.893	0.692	1.921	30.379	5.471	69.542	74.646	89.323	0.034	27.268	0.105	0.28
L. chejuensis-1	replicate 1	0.045	7.149	37.96	22.548	10.799	78.68	31.025	108.333	64.464	61.354	67.394	21.014	5.632	14.265	2.623	3.091	8.677	5.842	2.233	137.67	24.996	17.134	47.51	53.766	2.151	0.247	23.143	16.723	0.936	48.616	0.117	2.803	19.329	1.441	116.763	1.703	1083.59	0.979	2.201	104.835	4.151	49.829	46.145	69.254	0.025	17.319	0.079	0.2
L. chejuensis-2	replicate 2	0.057	6.712	42.162	21.809	11.38	83.369	32.268	131.511	68.665	71.425	76.414	24.636	6.205	12.116	2.081	2.58	8.731	6.69	2.234	158.485	29.688	20.327	58.872	62.181	2.224	0.309	28.138	19.453	0.983	60.497	0.108	2.951	23.855	1.487	139.823	1.999	1019.45	1.139	2.291	103.487	5.101	59.503	56.651	73.519	0.03	18.666	0.106	0.273
L. chejuensis-3	replicate 3	0.046	4.963	44.139	24.617	10.572	87.895	32.813	127.947	68.907	74.312	78.223	23.81	5.998	10.371	1.747	2.29	8.858	6.606	2.351	155.814	29.021	20.087	51.957	58.423	2.227	0.289	27.899	19.638	0.995	57.283	0.108	2.963	23.084	1.355	134.859	1.805	1074.74	1.05	2.331	103.197	5.007	57.915	56.852	70.575	0.029	23.793	0.097	0.254
L. squamigera-1	replicate 1	0.098	5.551	21.258	17.981	10.07	51.866	7.471	69.301	49.91	36.638	43.408	12.183	3.571	7.548	1.429	1.559	4.443	4.659	1.413	30.293	11.644	7.7	30.348	5.578	2.562	0.104	25.962	14.635	0.344	13.663	0.114	0.949	5.493	0.671	75.473	1.312	186.804	0.122	1.059	8.73	2.782	29.231	28.91	55.58	0.015	9.263	0.053	0.11
L. squamigera-2	replicate 2	0.099	6.966	21.703	27.564	9.72	51.632	7.106	72.884	50.972	34.992	41.14	10.424	3.609	6.865	1.287	1.423	4.299	4.21	1.732	28.578	11.004	7.171	34.378	5.258	2.565	0.123	23.788	13.863	0.38	10.909	0.12	0.823	4.777	0.643	71.004	1.242	177.797	0.107	0.968	7.711	2.481	26.236	28.152	51.967	0.019	9.78	0.056	0.116
L. squamigera-3	replicate 3	0.098	4.69	19.366	22.884	10.685	50.744	7.329	75.26	49.663	34.018	38.956	10.024	3.421	5.445	1.005	1.043	4.588	4.435	1.445	31.362	11.758	7.447	34.233	5.535	2.699	0.094	27.07	15.397	0.387	13.665	0.106	0.948	5.861	0.654	82.45	1.297	199.798	0.135	1.127	9.011	2.912	30.789	32.445	56.005	0.017	10.798	0.067	0.14
[truncated: 15 more columns]
